# Supplementary material
Source: PubMed Central journal article supplement (PMC4302891)
Supplement: supp_141.21.4182_DEV111260supp.pdf [file supp_141.21.4182_DEV111260supp.pdf]

## **Supplementary Materials and Methods**

### **Immunostaining**

Mouse brains were dissected in PBS and fixed overnight in 4% paraformaldehyde in PBS at 4°C. Brains were then cryoprotected using 30% sucrose in PBS overnight at 4°C and embedded in OCT for cryosectioning. Frozen sections were washed with 0.2% Triton X-100 in TBS (TBST) and incubated in the blocking solution (3% normal donkey serum in TBST) for 1 hour at room temperature. Sections were incubated with primary antibodies (Table S1) diluted in the blocking solution overnight at 4°C, washed with TBST, and incubated with DyLight- or Alexa Fluor-conjugated secondary antibodies (Jackson ImmunoResearch) diluted at 1:1000 in the blocking solution for 2 hours at room temperature. Sections were counterstained with DAPI, washed in TBST, and mounted in ProLong Gold antifade reagent (Invitrogen). For BrdU detection, sections were first treated with 1N HCl at 45°C for 30 minutes, washed with TBST, and processed as above using an anti-BrdU antibody. For costaining using an anti-BrdU antibody and other primary antibodies, sections were first stained with the other primary antibodies, cross-linked in 4% paraformaldehyde in PBS for 20 minutes at room temperature, then stained with the anti-BrdU antibody.

Fig S1

Lavado et al

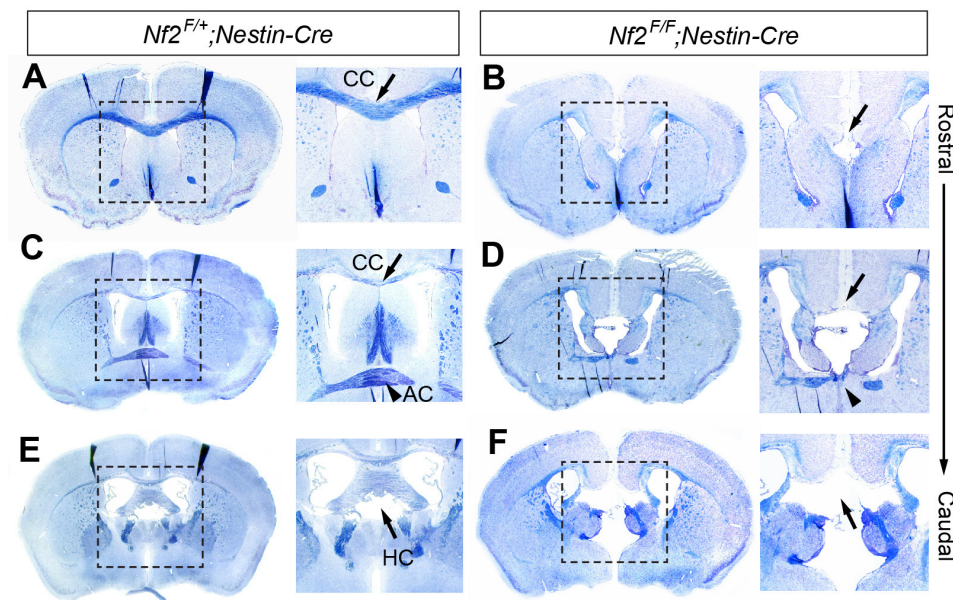

**Fig. S1. Deleting *Nf2* with *Nestin-Cre* leads to agenesis of forebrain commissures.** Luxol blue staining of myelinated axons (blue) and cresyl violet staining of neuronal cell bodies (purple) showing agenesis of the corpus callosum (CC) (A–D, arrow), anterior commissure (AC) (C,D, arrowhead), and hippocampal commissure (HC) (E,F, arrow) in 2-month-old *Nf2<sup>F/F</sup>;Nestin-Cre* mice. *n*=3. A magnified view of the boxed region is shown in the image to the right.

Fig S2

Lavado et al

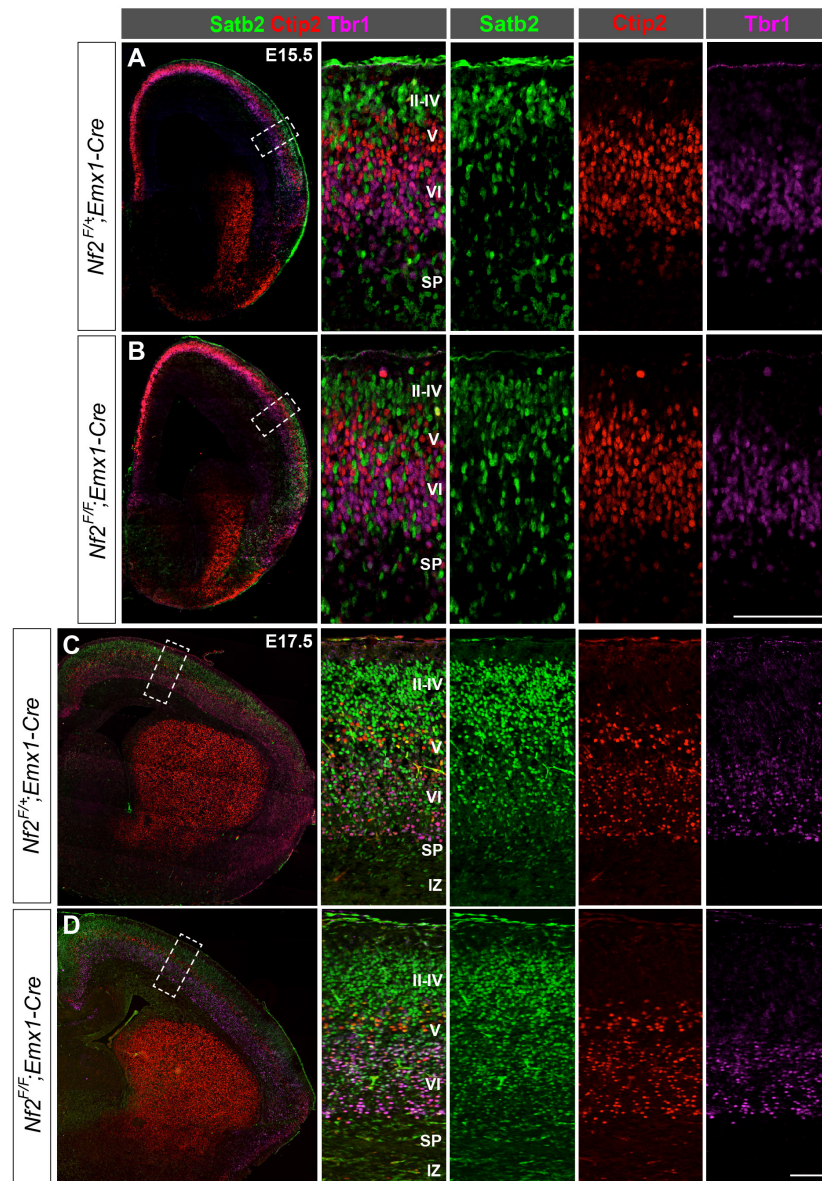

**Fig. S2. Specification and production of callosal neurons are unaffected in *Nf2* mutants.** Co-immunostaining showing proper expression of the callosal neuron-specific marker *Satb2* in *Nf2<sup>F/F</sup>;Emx1-Cre* neocortex and its proper laminar organization at E15.5 and E17.5. Images in the left column show low-magnified views. Regions in dashed boxes are enlarged in images to the right. SP: subplate; IZ: intermediate zone. Scale bars: 50  $\mu$ m.

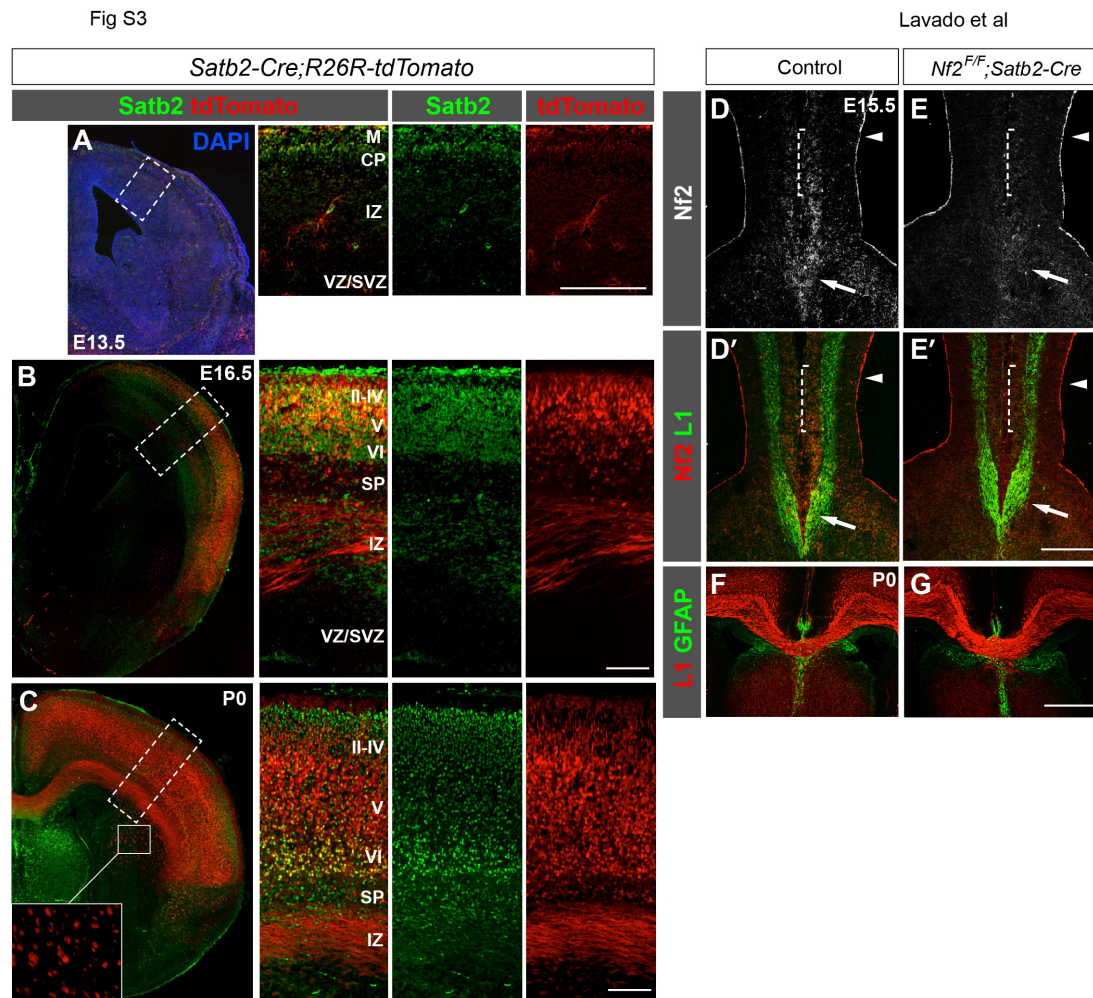

**Fig. S3. Deleting *Nf2* in callosal neurons by using *Satb2-Cre* does not affect corpus callosum formation.** (A–C) Co-immunostaining of *Satb2* and *tdTomato* shows *tdTomato* expression in *Satb2*<sup>+</sup> callosal neurons but not in ventricular zone and subventricular zone (VZ/SVZ) progenitor cells. *TdTomato* expression depends on Cre-mediated excision of the *LSL* (*loxP-stop-loxP*)-cassette in the *R26R-tdTomato* allele. As a consequence, *tdTomato* expression lags slightly behind *Satb2* expression, which is likely why most *Satb2*<sup>+</sup> cells at E13.5 are *tdTomato*-negative (A), as are the uppermost layer of *Satb2*<sup>+</sup> cells at P0 (C). Inset in C shows a magnified view of the internal capsule, which also contains *tdTomato*-labeled axons. CP: cortical plate; IZ: intermediate zone; M: meninges; SP: subplate. (D–E') In E15.5 *Nf2<sup>F/F</sup>;Satb2-Cre* brains, *Nf2* immunoreactivity in the cortical plate (dashed bracket) and callosal axons (arrow) is eliminated but that in the ventricular surface (arrowhead) is unperturbed. (F,G) The corpus callosum forms normally in P0 *Nf2<sup>F/F</sup>;Satb2-Cre* brains. Scale bars: 50  $\mu$ m in A,B,C; 200  $\mu$ m in E'; 500  $\mu$ m in G.

Fig S4

Lavado et al.

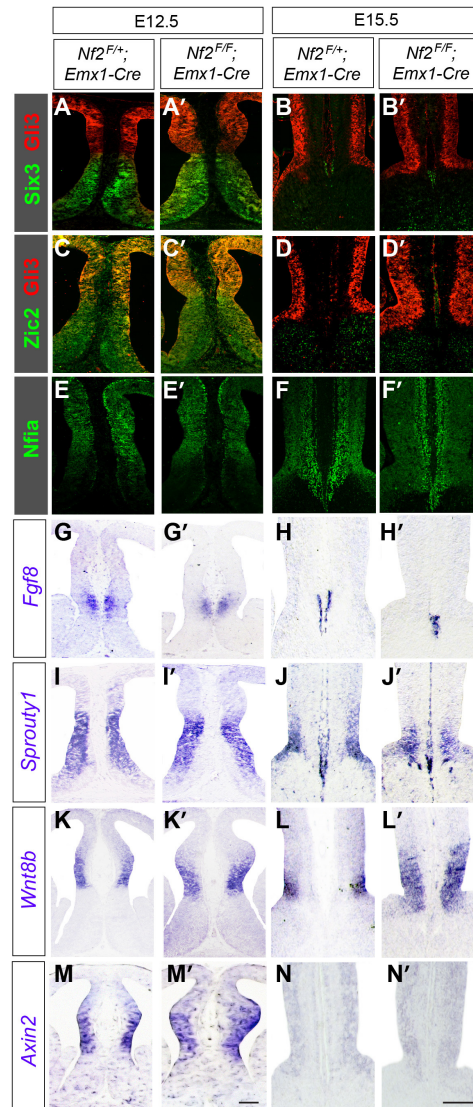

**Fig. S4. Patterning of the corticoseptal boundary is grossly normal in *Nf2* mutants.**

Immunostaining and *in situ* hybridization show proper expression of *Six3*, *Zic2*, *Nfia* (transcription factors that delineate subdomains of the commissural plate), *Gli3*, *Fgf8* (molecules required for corticoseptal boundary patterning), *Sprouty1*, *Wnt8b*, and *Axin2* in *Nf2<sup>F/F</sup>;Emx1-Cre* midline at E12.5 and E15.5. The *Wnt8b<sup>+</sup>* region is elongated dorsoventrally in E15.5 *Nf2<sup>F/F</sup>;Emx1-Cre* midline (L'). Scale bars: 200  $\mu$ m.

Fig S5

Lavado et al.

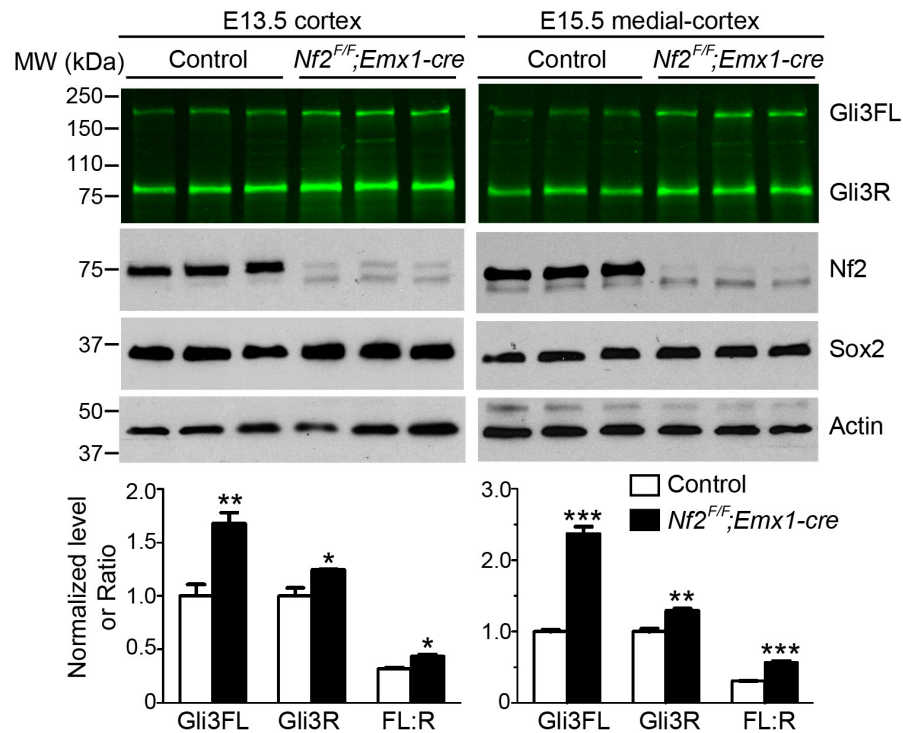

**Fig. S5. Gli3 protein levels are altered in *Nf2* mutants.** Quantitative western blot analyses using an antibody against the N-terminus of Gli3 detect both the full-length activator form (Gli3FL) and cleaved repressor form (Gli3R). Graphs show normalized levels of Gli3FL and Gli3R, with the levels of each form in controls set as 1, and the ratio of Gli3FL to Gli3R (FL:R).  $n=3$  embryos per genotype, \* $P<0.05$ , \*\* $P<0.01$ , \*\*\* $P<0.001$ . Because Gli3 expression is mostly restricted to neural progenitor cells, the neural progenitor marker Sox2 was used as a loading-control in addition to Actin.

Fig S6

Lavado et al.

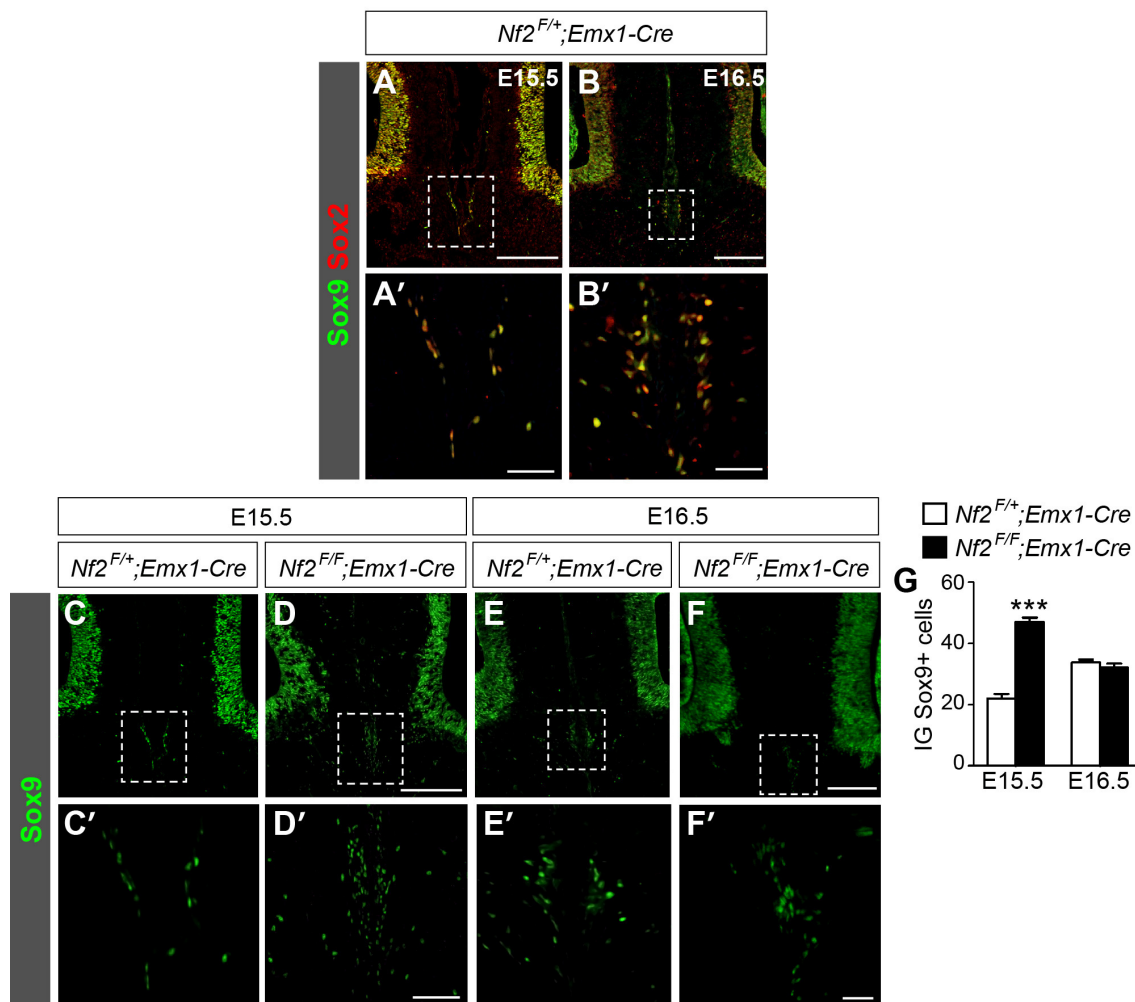

**Fig. S6. The number of indusium griseum glia is transiently increased in *Nf2* mutants.**

(A–C) Co-immunostaining shows the Sox2 antibody and Sox9 antibody label the same population of cells at the indusium griseum. (C–G) The number of indusium griseum (IG) Sox9<sup>+</sup> cells is increased in *Nf2*<sup>F/F</sup>; *Emx1-Cre* embryos at E15.5 ( $n=4$ ) but is similar to that in controls at E16.5 ( $n=3$ ). \*\*\* $P<0.001$ . Scale bars: 200  $\mu\text{m}$  in A,B,D,F; 50  $\mu\text{m}$  in A',B',D'; 20  $\mu\text{m}$  in F'.

Fig S7

Lavado et al.

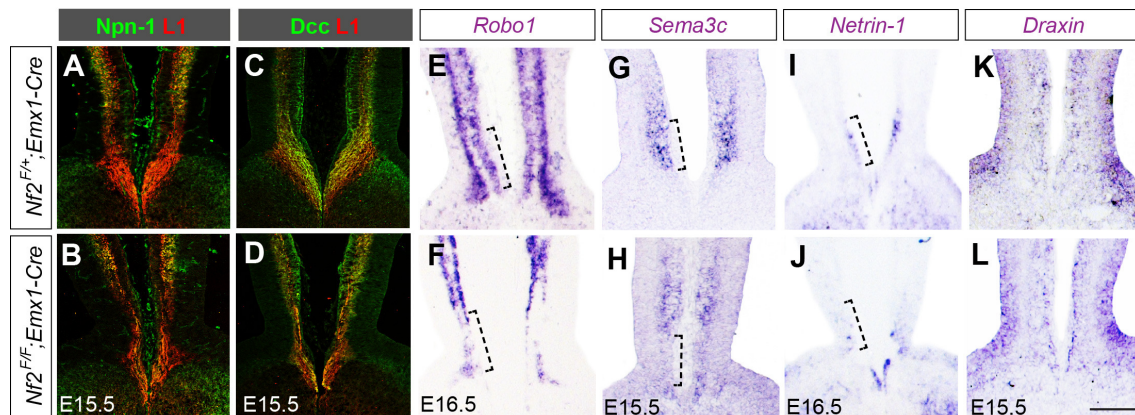

**Fig. S7. Proper expression of axon guidance molecules in *Nf2* mutants.** Expression patterns of guidance receptors Neuropilin-1(Npn-1), Dcc, and Robo1 and guidance cues Sema3c, Netrin-1, and Draxin are normal in *Nf2*<sup>F/F</sup>;*Emx1-Cre* midline region. The apparent reduction of *Robo1*, *Sema3c*, and *Netrin-1* *in situ* signals (dashed brackets) in *Nf2*<sup>F/F</sup>;*Emx1-Cre* midline is likely due to reduction of the Calretinin<sup>+</sup> guidepost neurons that express these genes. Scale bar: 200  $\mu$ m.

Fig S8

Lavado et al.

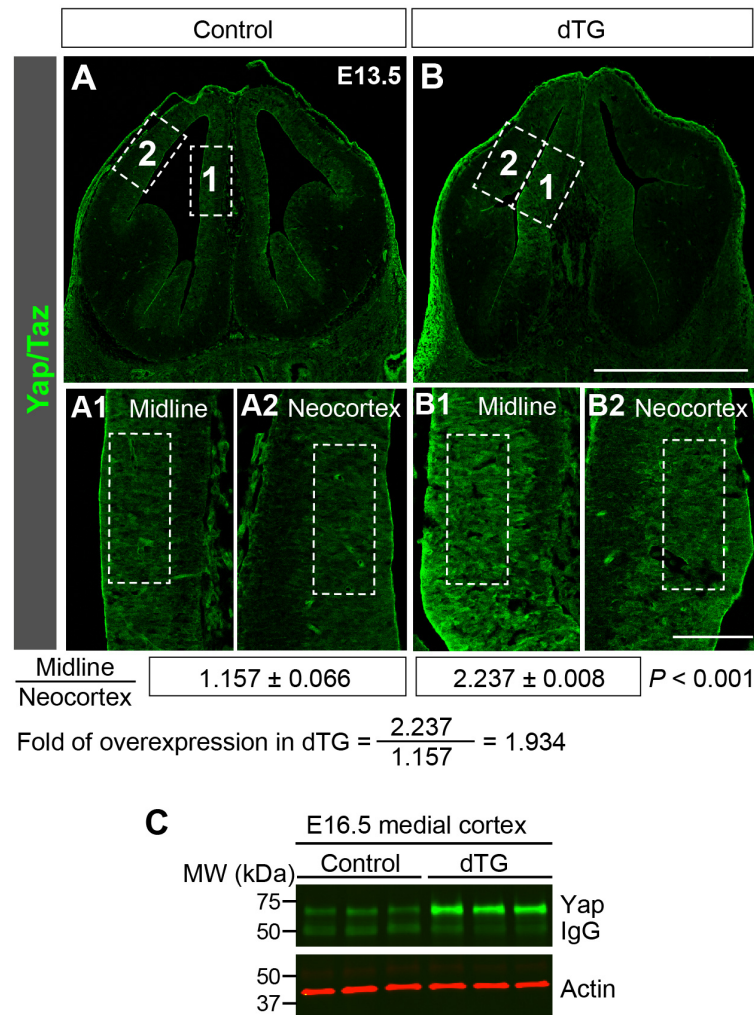

**Fig. S8. Overexpressing YAP using *TetO-YAP1* and *Axin2-rtTA* double transgenic system.** (A,B) Quantification of the level of YAP overexpression by measuring the fluorescence intensity of Yap/Taz immunostaining signals. To control for staining variations between sections, the intensity at the midline region (dashed box 1) was normalized to that at the neocortex region (dashed box 2) of the same section. The ratio of fluorescence intensity at the midline region and the neocortex region is shown below the confocal images.  $n=3$  embryos per genotype, 6 sections per embryo. Scale bars: 1mm in B; 200  $\mu$ m in B2. (C) Quantitative western blot analysis of E16.5 medial-cortex tissues.

**Table S1. Primary antibodies for immunostaining and western blotting.**

| Antibody                    | Host species | Vendor         | Catalog #    | Dilution in immunostaining                      | Dilution in western blot          |
|-----------------------------|--------------|----------------|--------------|-------------------------------------------------|-----------------------------------|
| Merlin/Nf2                  | rabbit       | Santa Cruz     | sc-332       | 1:200 and amplification with Invitrogen TSA kit |                                   |
| Nf2                         | rabbit       | Sigma          | HPA003097    | 1:500                                           | 1:1000                            |
| L1                          | rat          | Millipore      | MAB5272      | 1:500                                           |                                   |
| GFAP                        | rabbit       | Dako           | Z0334        | 1:1000                                          |                                   |
| Satb2                       | mouse        | Abcam          | ab51502      | 1:100                                           |                                   |
| Ctip2                       | rat          | Abcam          | ab18465      | 1:250                                           |                                   |
| Tbr1                        | rabbit       | Abcam          | ab31490      | 1:200                                           |                                   |
| Tbr1                        | rabbit       | Millipore      | AB10554      | 1:500                                           |                                   |
| Sox2                        | goat         | Santa Cruz     | sc-17320     | 1:100                                           |                                   |
| Sox2                        | rabbit       | Cell Signaling | 3728         |                                                 | 1:500                             |
| Sox9                        | rabbit       | Millipore      | ab5535       | 1:500                                           |                                   |
| BrdU                        | rat          | Accurate       | OBT00306     | 1:1000                                          |                                   |
| Calretinin                  | rabbit       | Thermo         | RB-9002-P0   | 1:500                                           |                                   |
| Calretinin                  | rabbit       | Millipore      | AB149        | 1:5000                                          |                                   |
| Npn-1                       | goat         | R&D            | AF566        | 1:500                                           |                                   |
| Dcc                         | mouse        | BD Pharmigen   | 554223       | 1:100                                           |                                   |
| Gli3                        | goat         | R&D            | AF3690       | 1:100                                           | 1:500 (ECL);<br>1:25 (LI-COR)     |
| Zic2                        | rabbit       | Millipore      | AB15392      | 1:1000                                          |                                   |
| Tbr2                        | rat          | eBiosciences   | 14-4875-82   | 1:500                                           |                                   |
| Tbr2 (Alexa-647-conjugated) | mouse        | eBiosciences   | 51-4875-80   | 1:100                                           |                                   |
| Nf1-A                       | rabbit       | Active motif   | 39398        | 1:1000                                          |                                   |
| Yap/Taz                     | rabbit       | Cell Signaling | 8418         | 1:500                                           |                                   |
| Yap                         | mouse        | Sigma          | WH0010413 M1 |                                                 | 1:1000 (ECL);<br>1:100 (LI-COR)   |
| Six3                        | rabbit       | from G. Oliver |              | 1:500                                           |                                   |
| GFP                         | chick        | Aves           | GFP-1020     | 1:1000                                          |                                   |
| Actin                       | mouse        | Ambion         | AM4302       |                                                 | 1:40000 (ECL);<br>1:2000 (LI-COR) |

**Table S2. In situ probes**

| Probe    | Sequence                                                                                   | Starts                  | Size (bp) |
|----------|--------------------------------------------------------------------------------------------|-------------------------|-----------|
| Slit2    | Starts in position 4340 of rat Slit2 (NM_022632.2)                                         | 5'-TTACGTAGGAGGTATGCCTG | 1600      |
| Robo-1   | Starts in position 250 of rat Robo-1 (NM_022188.1)                                         | 5'-CCCGCCACCCTCAACTGTAA | 1000      |
| Netrin-1 | Starts in position 4264 of mouse Netrin-1 (NM_008744.2)                                    | 5'-TGTAGCAAATAACATCCAGC | 760       |
| Sema3C   | Starts in position 1671 of mouse Sema3C (NM-013657.5)                                      | 5'-AGCAACAGTTGTACGTGAGC | 700       |
| Draxin   | Full cDNA, mouse (IMAGE clone 6853328)                                                     | 5'-GAGCAGCCTCCTGCCACCCG | 5161      |
| Fgf8     | Full cDNA of transcript variant 4, with partials 5'-UTR and 3'-UTR, mouse (NM_001166363.1) | 5'-CCCGCTCCGCGCTGAGCTGC | 800       |
| Sprouty1 | Full cDNA, mouse (Addgene 22091)                                                           | 5'-CCGCAGCCAGAGCTCTGCGG | 1500      |
| Wnt8b    | Full cDNA, mouse (IMAGE clone 615408 moved into pCMV-SPORT2)                               | 5'-TTCATTTTACCACCCCTTAA | 478       |
| Axin2    | Starts in position 350 of mouse Axin2 (NM_015732.4)                                        | 5'-ATGAGTAGCGCCGTGTTAGT | 2322      |

**Table S3. Quantitative RT-PCR primers**

| <b>Primer</b>       | <b>Sequence</b>         | <b>Note</b> |
|---------------------|-------------------------|-------------|
| mouse Axin2 forward | AAGTGTCTCTACCTCATTTTCCG |             |
| mouse Axin2 reverse | TCCAGTTTCAGTTTCTCCAGC   |             |
| mouse Slit2 forward | GATCTCTTTAACCCCTGCCAG   |             |
| mouse Slit2 reverse | TCCCTTATCCGTTCCCCTC     |             |
| mouse Gusb forward  | CACCCCTACCACTTACATCG    | normalizer  |
| mouse Gusb reverse  | ACTTTGCCACCCTCATCC      | normalizer  |
| human SLIT2 forward | TCTGTTTAACCCATGCCAGG    |             |
| human SLIT2 reverse | TCTCTTATCCTTTCCCCTCGAC  |             |
| human WNT5A forward | TCGCCCAGGTTGTAATTGAAG   |             |
| human WNT5A reverse | TGAGAAAGTCCTGCCAGTTG    |             |
| human CYR61 forward | CAAGGAGCTGGGATTGATG     |             |
| human CYR61 reverse | AAAGGGTTGTATAGGATGCGAG  |             |
| human GUSB forward  | AGGTGATGGAAGAAGTGGTG    | normalizer  |
| human GUSB reverse  | AGGATTTGGTGTGAGCGATC    | normalizer  |
